# Supplementary material
Source: PubMed Central journal article supplement (PMC5675538)

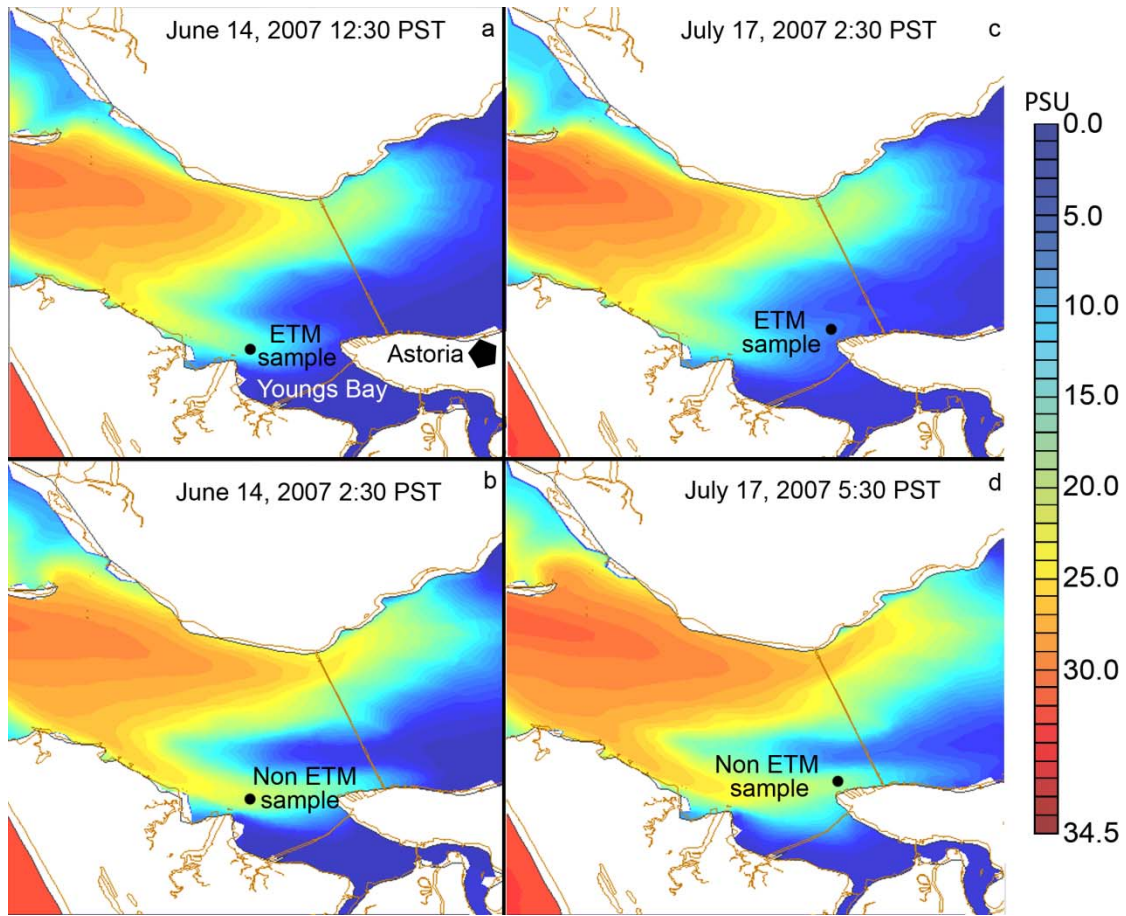

Fig. S1.

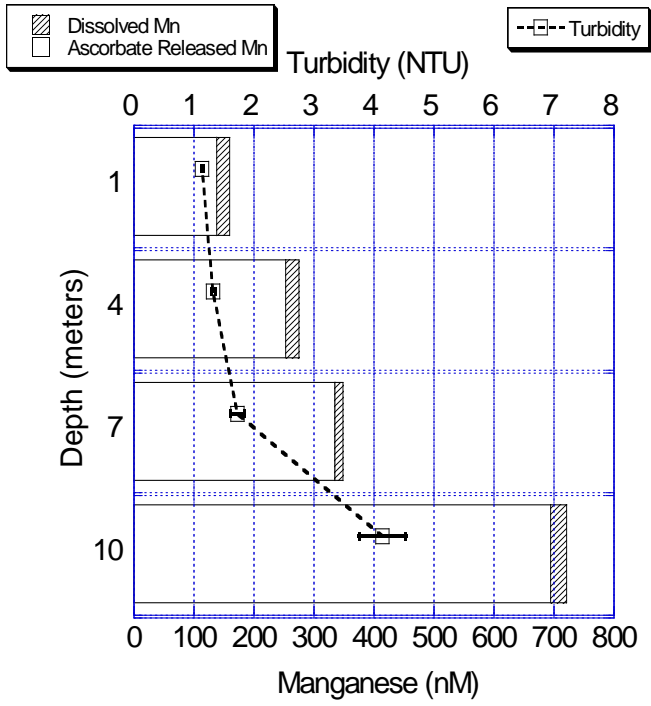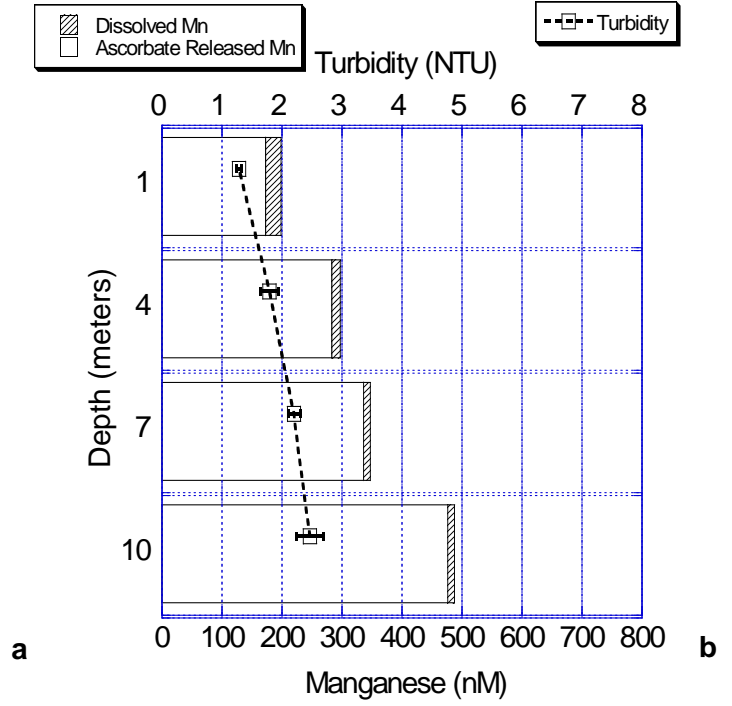

Fig. S2.

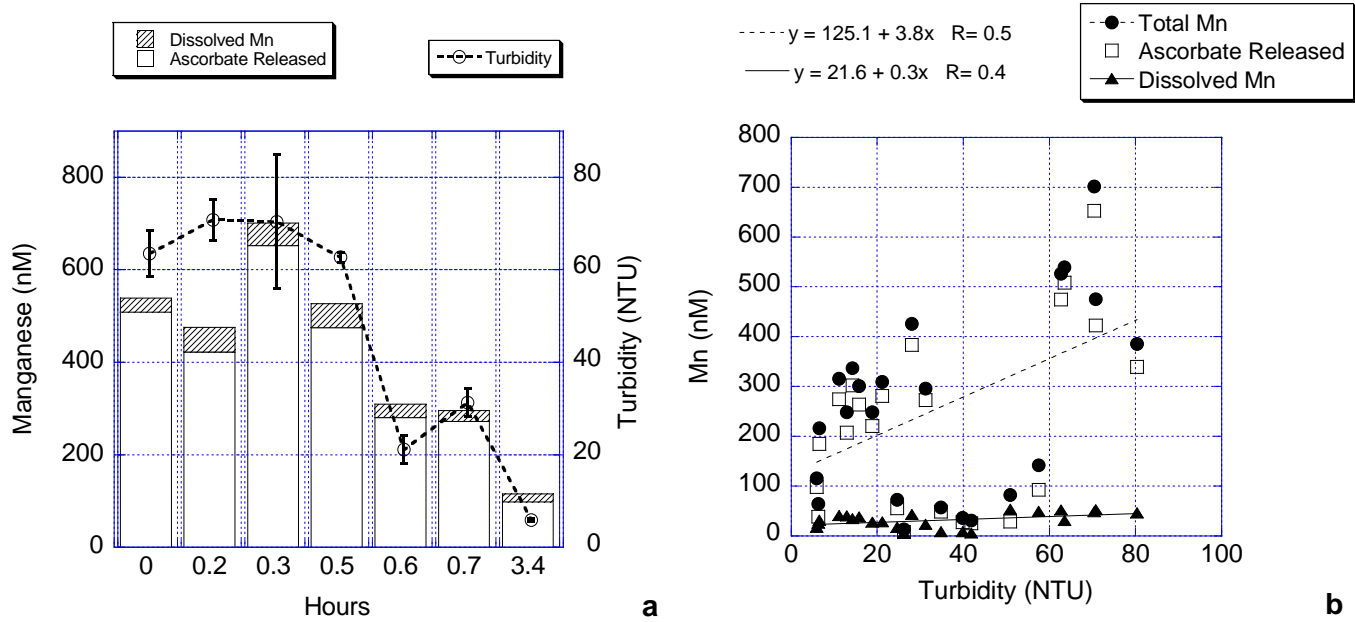

Fig. S3.

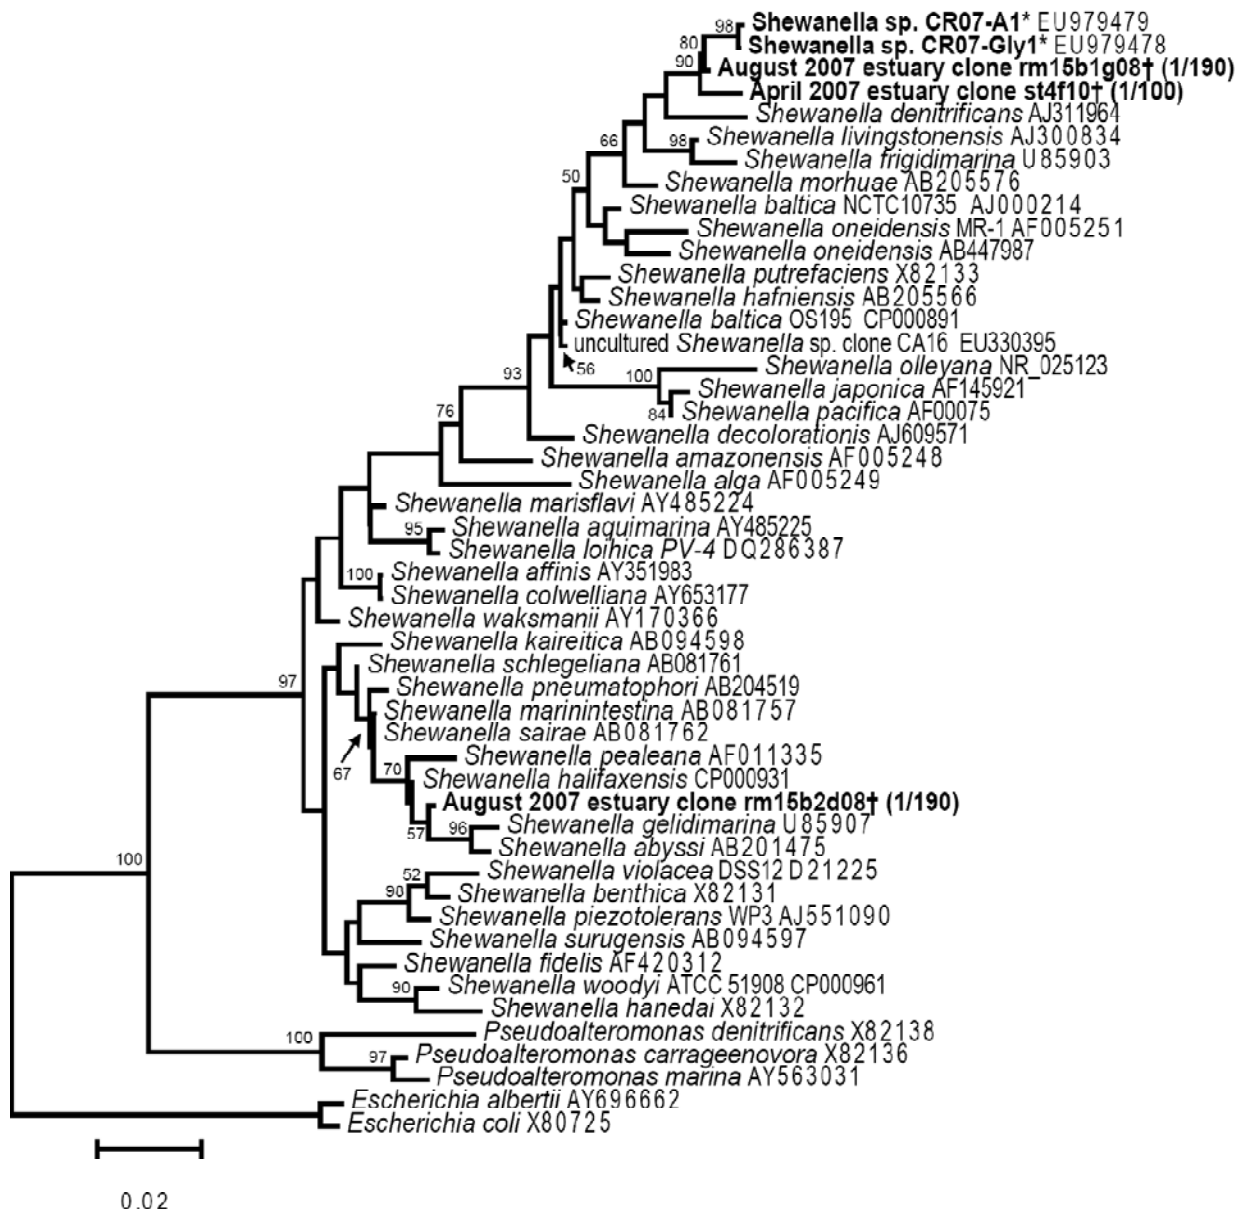

Fig. S4.

Supplement: NIHMS916692-supplement-Supporting_Info.pdf [file NIHMS916692-supplement-Supporting_Info.pdf]
